# Supplementary material
Source: PubMed Central journal article supplement (PMC3024091)

# Supplemental figure 2

## Presumed subcellular localization

- Mitochondrion
- ER
- Cytoplasm/undetermined
- Membrane
- Nucleus/Nuclear transient location
- Chloroplast
- Peroxisome
- Vacuole

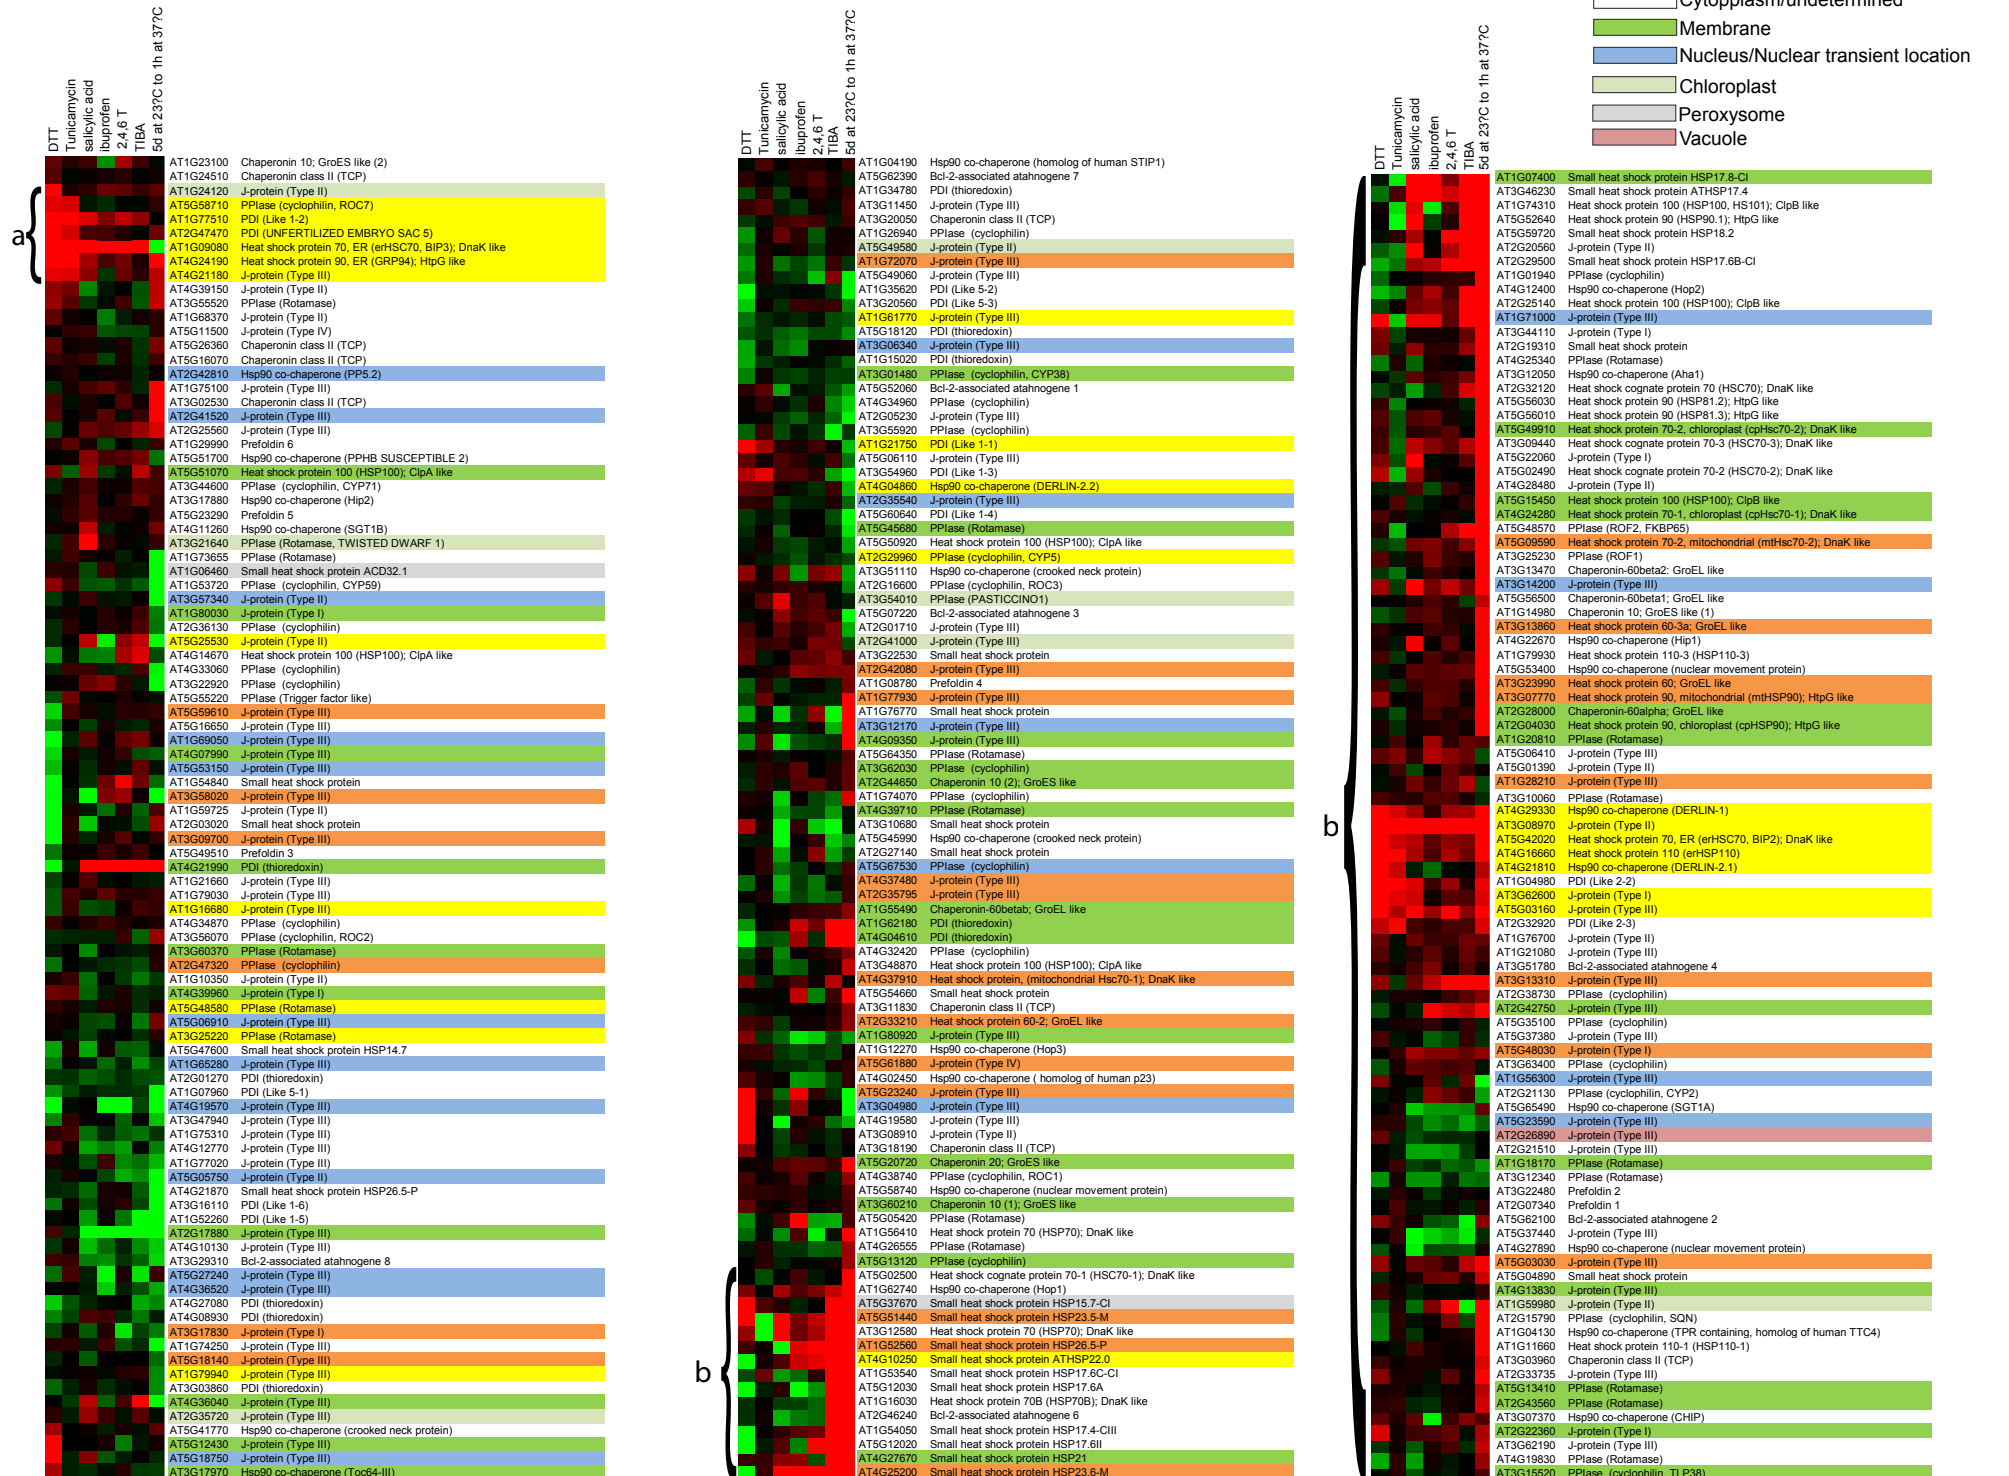

Supplement: 12192_2010_216_MOESM2_ESM.pdf [file 12192_2010_216_MOESM2_ESM.pdf]
