# Supplementary material
Source: PubMed Central journal article supplement (PMC3024091)
Supplement: 12192_2010_216_MOESM3_ESM.pdf [file 12192_2010_216_MOESM3_ESM.pdf]

# Supplemental figure 3

-1.5 Scale ( $\log_2$  fold induction) 1.5

A B C D E F G H I J K L M N O P Q R S T U

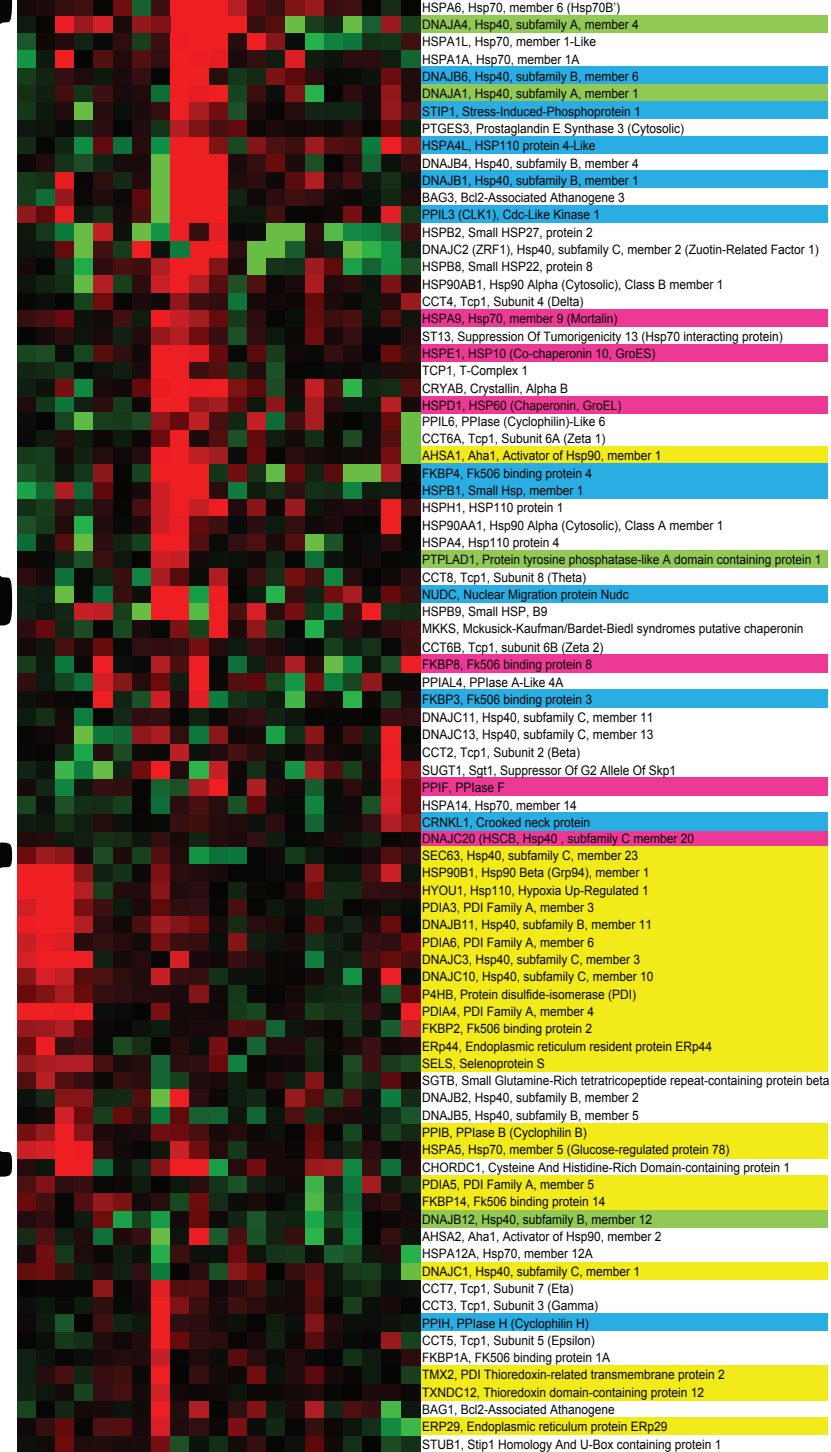

-1.5 Scale ( $\log_2$  fold induction) 1.5

A B C D E F G H I J K L M N O P Q R S T U

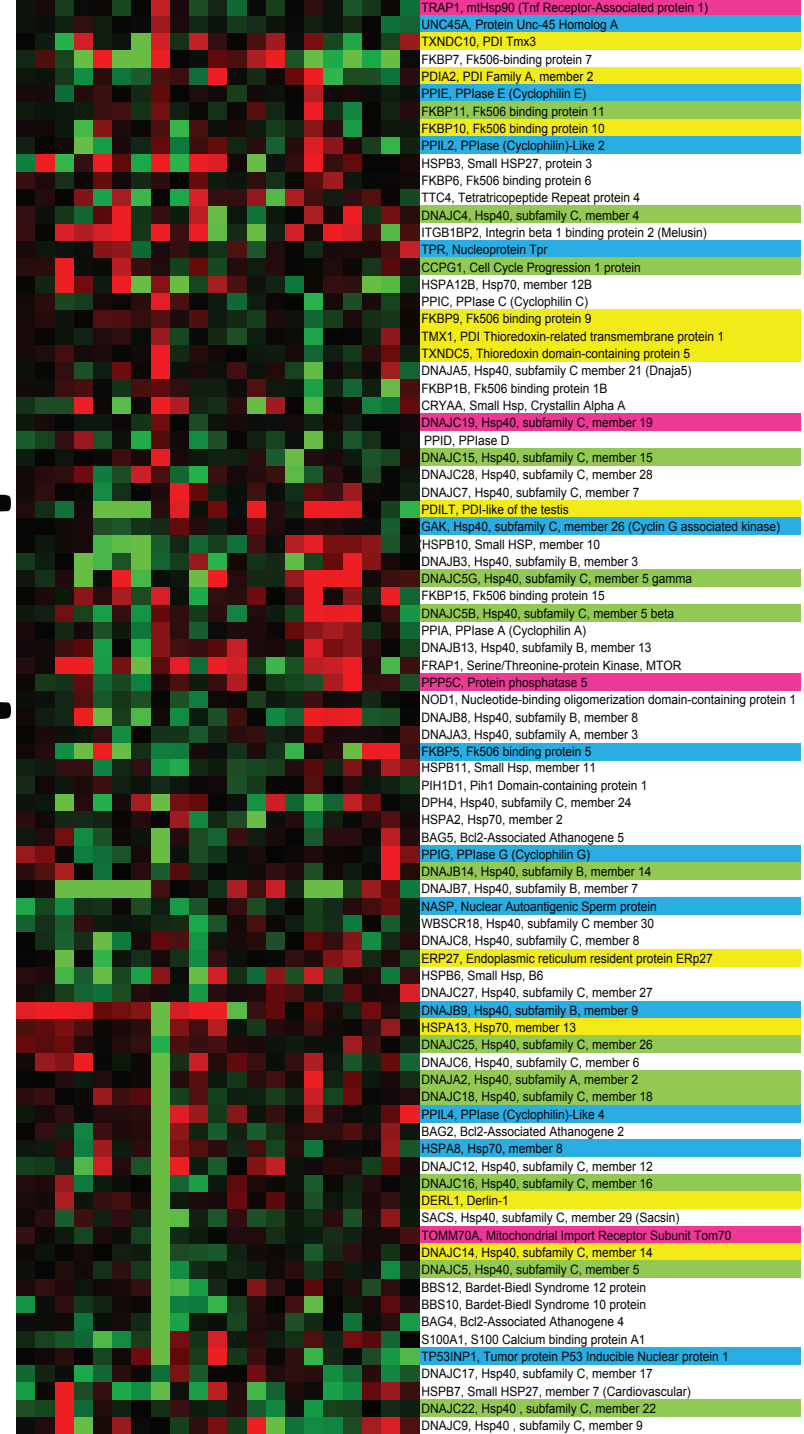

Presumed subcellular localization

- Cytoplasm
- ER
- Mitochondrion
- Membrane
- Nucleus/Nuclear transient location
