# Supplementary material
Source: PubMed Central journal article supplement (PMC3024091)

# Supplementary figure 1

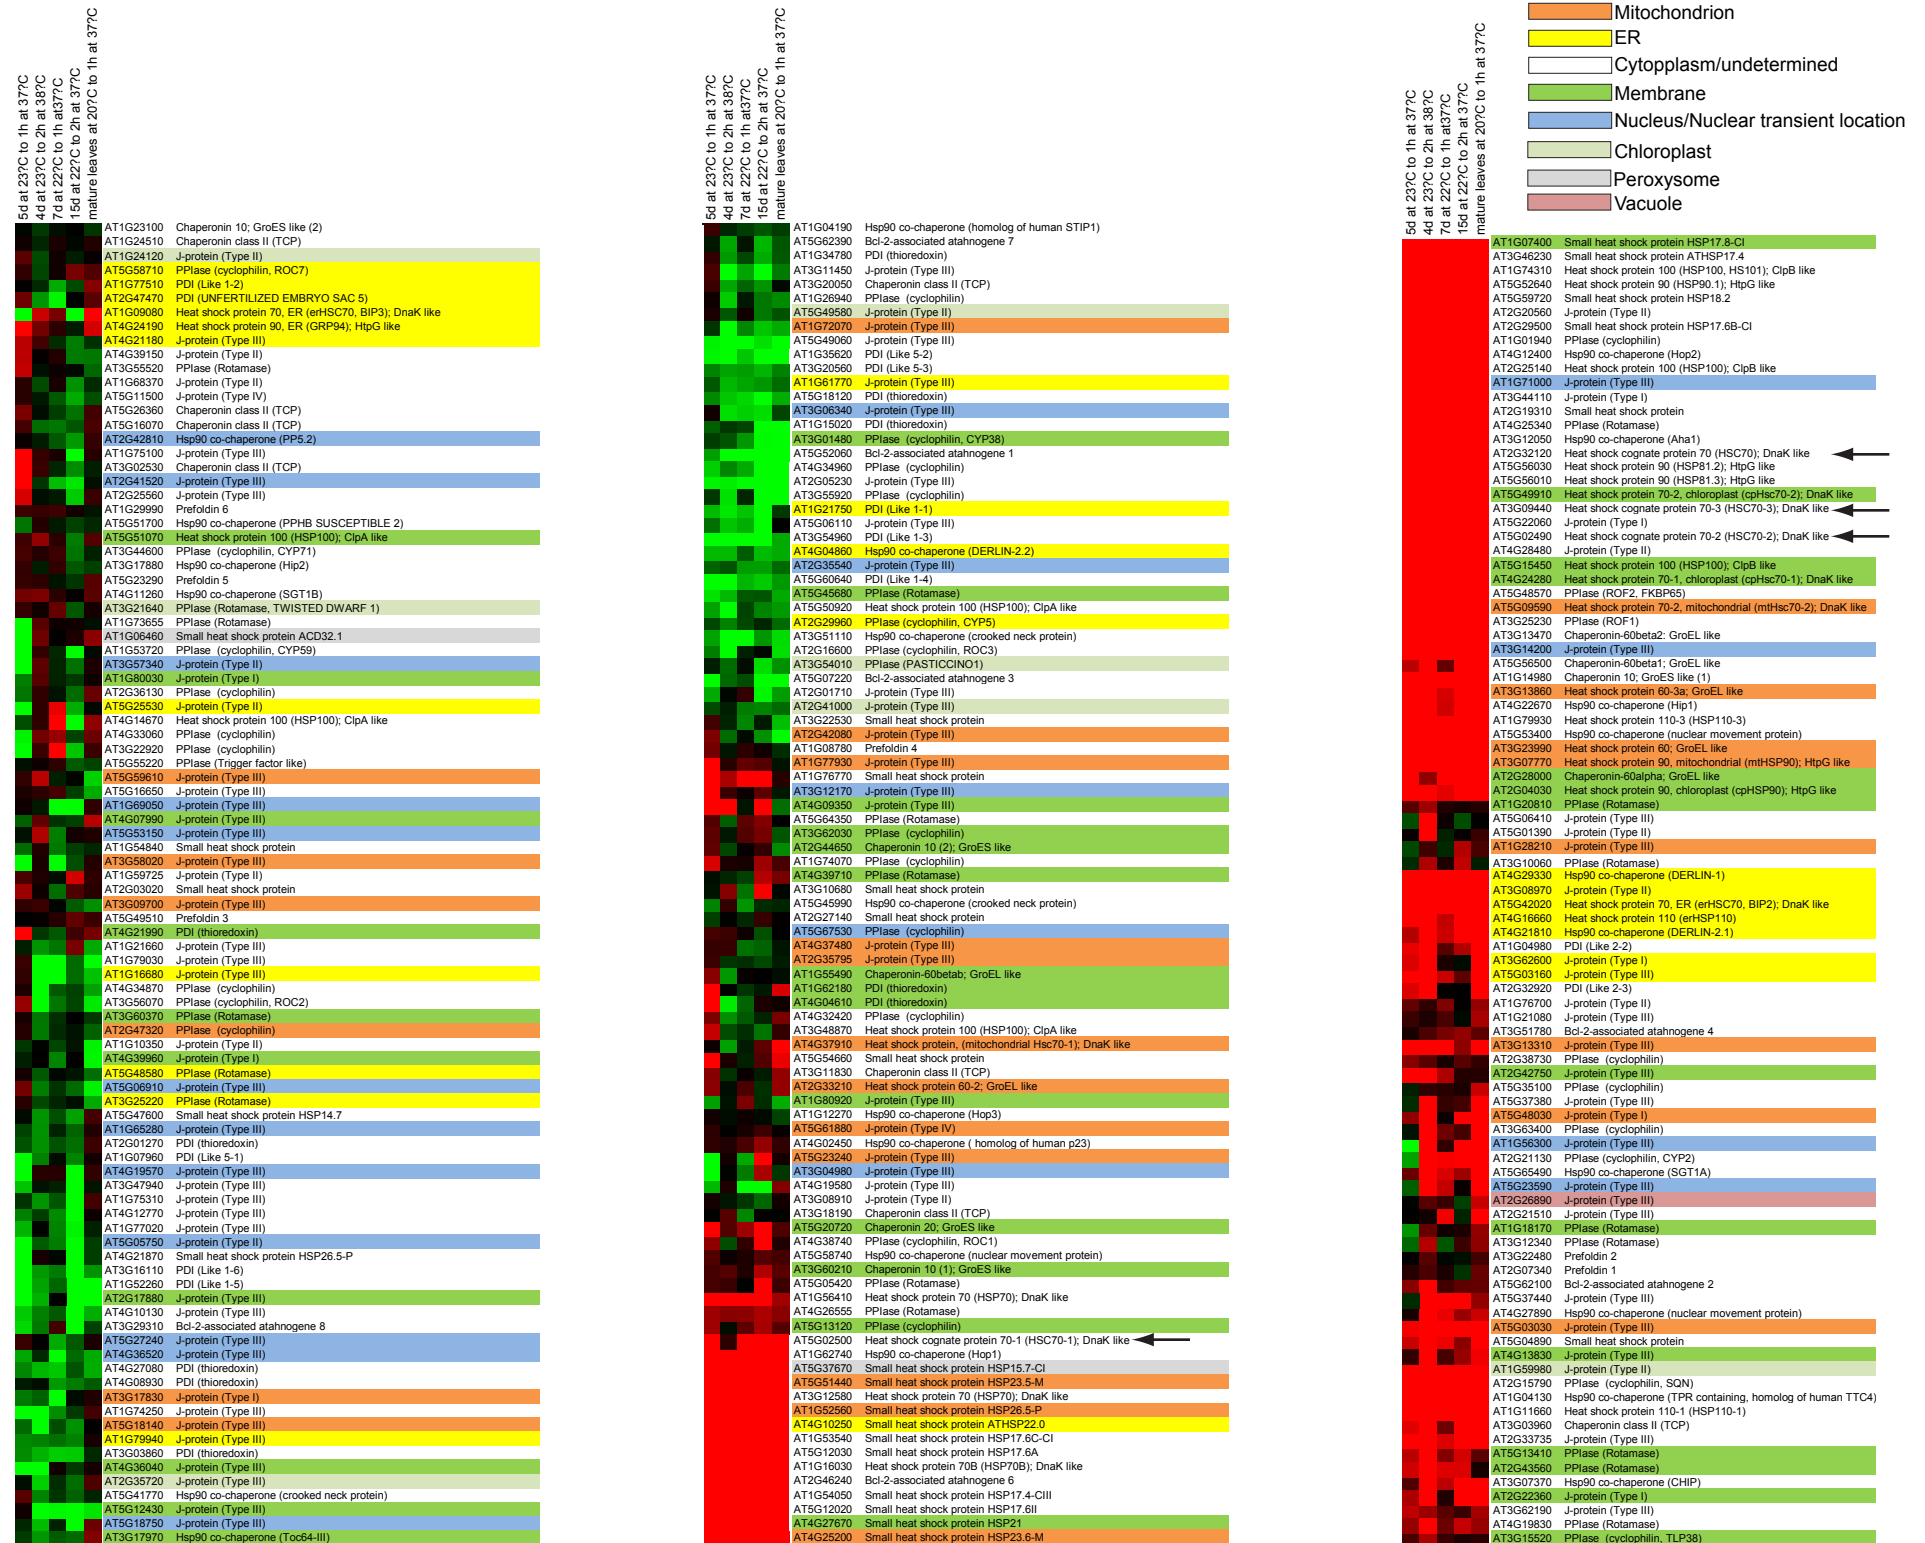

Supplement: 12192_2010_216_MOESM1_ESM.pdf [file 12192_2010_216_MOESM1_ESM.pdf]
